# Supplementary material for: Acetylene hydrogenation catalyzed by bare and Ni doped CeO2(110): the role of frustrated Lewis pairs
Source: Royal Society of Chemistry journal article supplement (doi:10.1039/d2cp00925k), 2022-01-01
Supplement: d2cp00925k1.pdf [file d2cp00925k1.pdf]

**Acetylene hydrogenation catalyzed by bare and Ni doped CeO<sub>2</sub>(110): The role of frustrated  
Lewis pairs**

Shulan Zhou,<sup>1,2</sup>\* Qiang Wan,<sup>3</sup> Sen Lin,<sup>3,\*</sup> and Hua Guo<sup>2</sup>

*<sup>1</sup>School of Chemistry and Chemical Engineering, Shandong University of Technology, Zibo  
255000, China*

*<sup>2</sup>Department of Chemistry and Chemical Biology, University of New Mexico, Albuquerque, New  
Mexico 87131, USA*

*<sup>3</sup>State Key Laboratory of Photocatalysis on Energy and Environment, College of Chemistry,  
Fuzhou University, Fuzhou 350002, China*

\*Corresponding authors. Email: [zhoushulan2009@126.com](mailto:zhoushulan2009@126.com), [slin@fzu.edu.cn](mailto:slin@fzu.edu.cn)

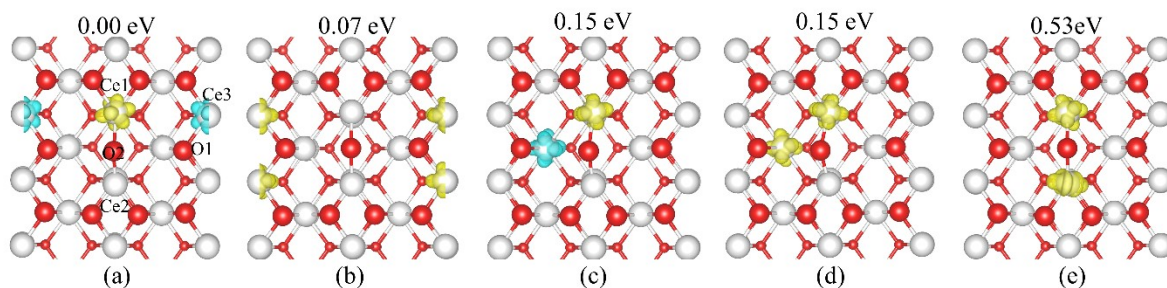

Figure S1 Calculated spin density with  $\text{Ce}^{3+}$  located at different positions for  $\text{CeO}_2(110)\text{-O}_v$ . The data is the energy of each configuration relative to the most stable one (a). Color scheme: Ce, white; oxygen, red; spin density, cyan or yellow.

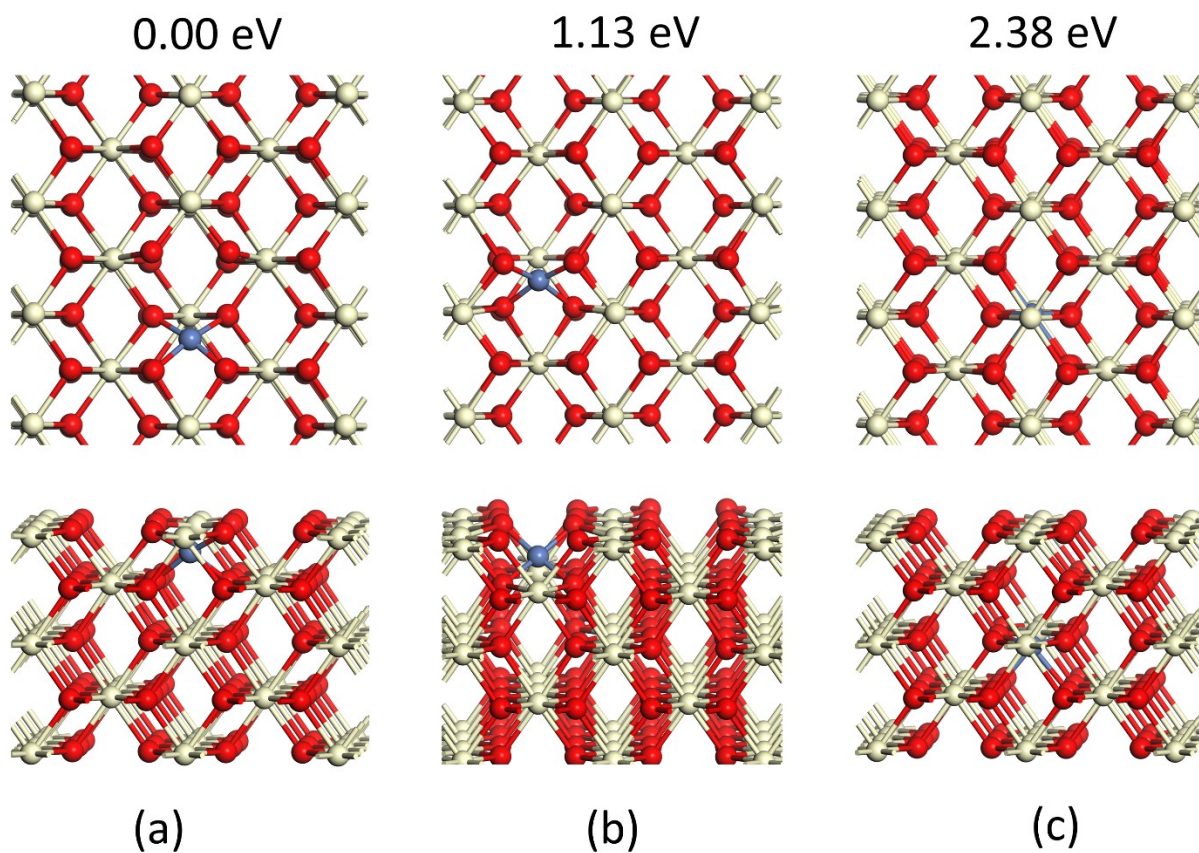

Figure S2 Top and side views of geometries of Ni doped  $\text{CeO}_2(110)$  with substituted Ce located at different layers. (a) Configuration 1 which a surface Ce (first layer) replaced by Ni; (b) Configuration 2 which a second layer Ce replaced by Ni; (c) Configuration 3 which a third layer Ce replaced by Ni. The values in the figure indicated the energies relative to that of configuration 1. Color scheme: Ni, blue; Ce, yellow; oxygen, red.

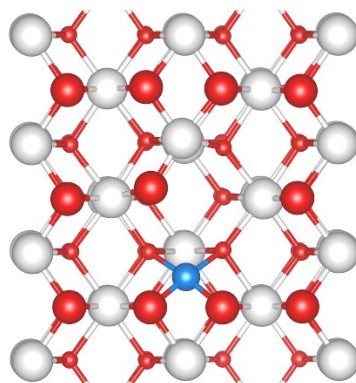

Figure S3 Calculated spin density of Ni-CeO<sub>2</sub>(110)-O<sub>v</sub>. Color scheme: Ni, blue; Ce, white; oxygen, red; spin density, cyan or yellow.

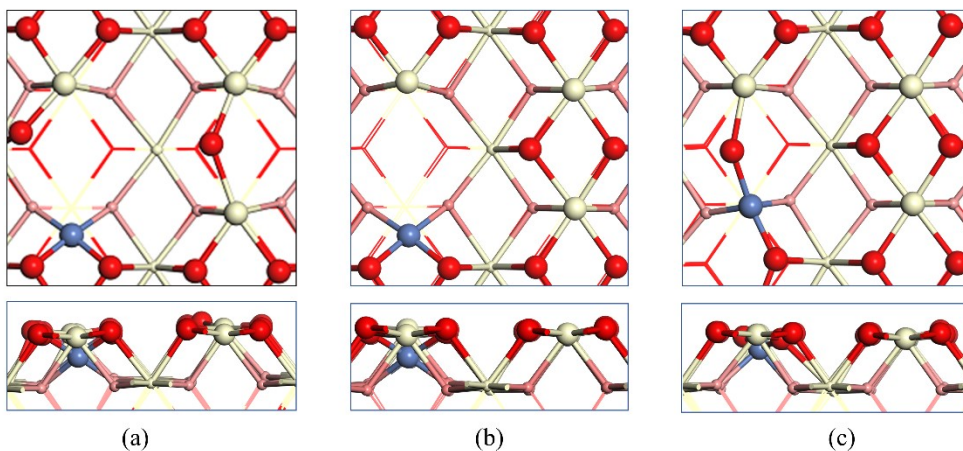

Figure S4 Top and side views of geometries of Ni-CeO<sub>2</sub>(110) with two O<sub>v</sub>s. (a) second O<sub>v</sub> located at O1, (b) second O<sub>v</sub> located at O2, (c) second O<sub>v</sub> located at O3. O1, O2 and O3 are indicated in Figure 1 (d). Color scheme: Ni, blue; Ce, yellow; oxygen, red; subsurface oxygen, light red.

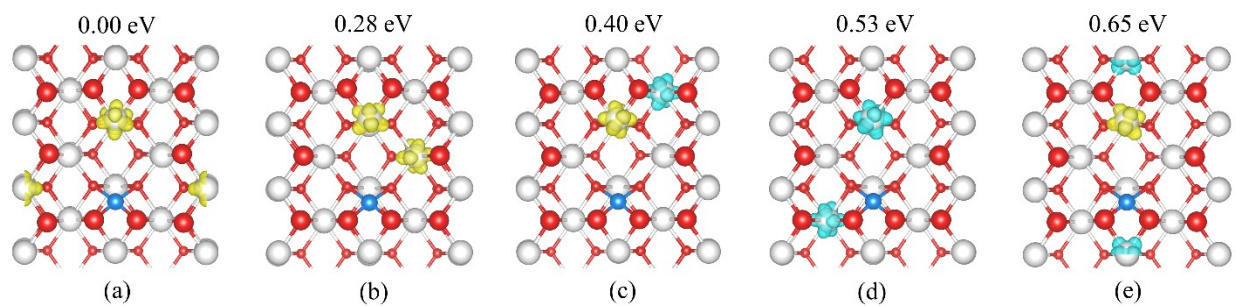

Figure S5 Calculated spin density with  $\text{Ce}^{3+}$  located at different positions for  $\text{Ni-CeO}_2(110)\text{-}2\text{O}_v$ . The data of each image is the energy of each configuration relative to the most stable one. Color scheme: Ni, blue; Ce, white; oxygen, red; spin density, cyan or yellow.

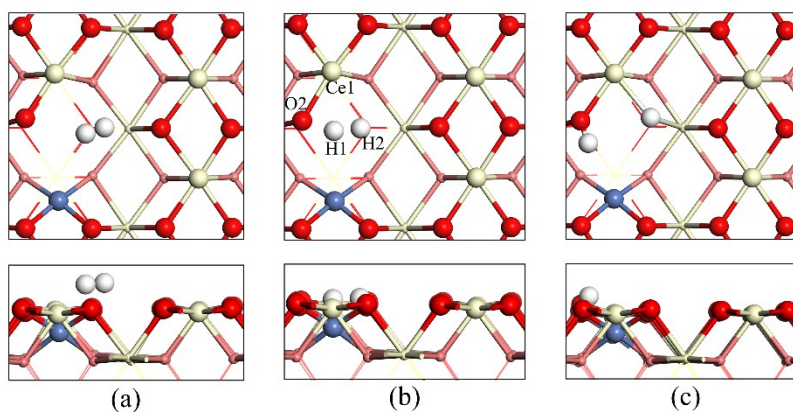

Figure S6 Top and side views of geometries related to H<sub>2</sub> dissociation on the Ce/O CLP at Ni-CeO<sub>2</sub>(110)-O<sub>v</sub>. (a) H<sub>2</sub> adsorption (H<sub>2</sub>\*), (b) TS of the H<sub>2</sub> dissociation, (c) heterolytic products (H\*-Ce + H\*-O). Color scheme: Ni, blue; Ce, yellow; oxygen, red; subsurface oxygen, light red; H, white.

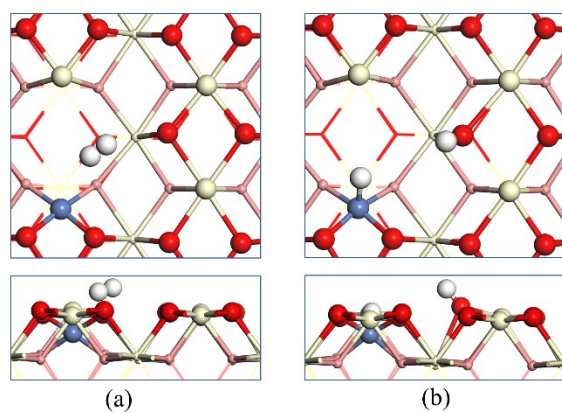

Figure S7 Top and side views of geometries of adsorbed H<sub>2</sub> (a) and dissociated H<sub>2</sub> (H\*-Ni+ H\*-O) (b) on Ni-CeO<sub>2</sub>(110)-2O<sub>v</sub>. Color scheme: Ni, blue; Ce, yellow; oxygen, red; subsurface oxygen, light red; H, white.
